# Supplementary material for: Unusual interlayer coupling in layered Cu-based ternary chalcogenides CuMCh2 (M = Sb, Bi; Ch = S, Se)
Source: Royal Society of Chemistry journal article supplement (doi:10.1039/d1nr04045f), 2021-01-01
Supplement: d1nr04045f1.pdf [file d1nr04045f1.pdf]

Supplementary Information for:

## Unusual interlayer coupling in layered Cu-based ternary chalcogenides $\text{CuMCh}_2$ ( $\text{M}=\text{Sb, Bi}$ ; $\text{Ch}=\text{S, Se}$ )

Dan-Dong Wang,<sup>†</sup> Xin-Gao Gong,<sup>†§†\*</sup> and Ji-Hui Yang<sup>††\*</sup>

<sup>†</sup>Key Laboratory of Computational Physical Sciences (Ministry of Education), State Key Laboratory of Surface Physics, and Department of Physics, Fudan University, Shanghai 200433, China

<sup>‡</sup>Shanghai Qi Zhi Institute, Shanghai 200232, China

<sup>§</sup>Collaborative Innovation Center of Advanced Microstructures, Nanjing 210093, China

\*corresponding author

Email: [jhyang04@fudan.edu.cn](mailto:jhyang04@fudan.edu.cn); [xggong@fudan.edu.cn](mailto:xggong@fudan.edu.cn)

## 1. The phonon spectrum of $\text{CuSbS}_2$ monolayer and bilayer.

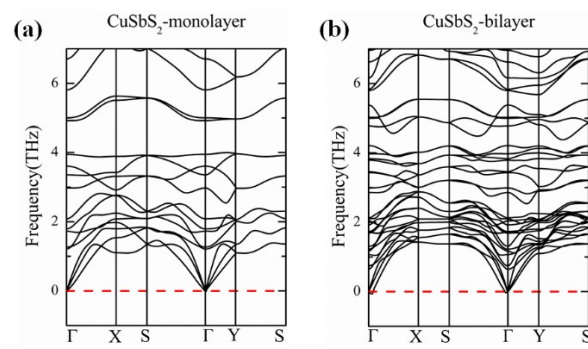

**Figure S1.** The phonon spectrum of  $\text{CuSbS}_2$  (a) monolayer and (b) bilayer.

## 2. HSE calculated band structure of $\text{CuSbS}_2$ monolayer.

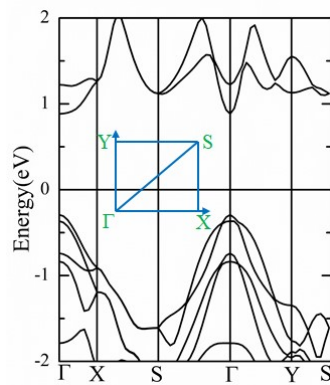

**Figure S2.** HSE band structure (see the blue inset for the high symmetrical K-points) without the spin-orbit coupling for monolayer  $\text{CuSbS}_2$  where the Fermi level has been set to 0 eV.

**3. The optical absorption spectra of in CuSbS<sub>2</sub> monolayer and CuSbSe<sub>2</sub> monolayer.**

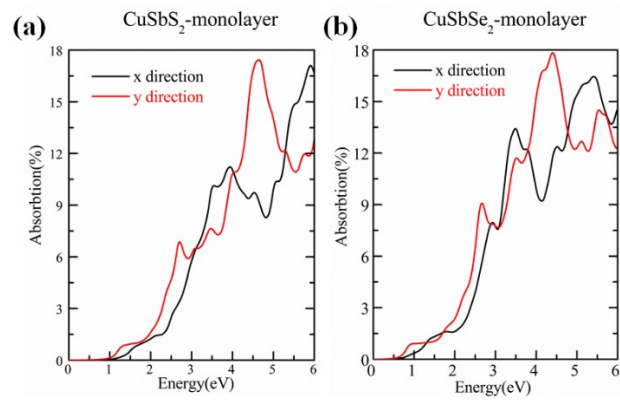

**Figure S3.** The optical absorption spectra of (a) CuSbS<sub>2</sub> monolayer and (b) CuSbSe<sub>2</sub> monolayer.

#### 4. Band alignments from the $\text{CuSbS}_2$ monolayer to four layers.

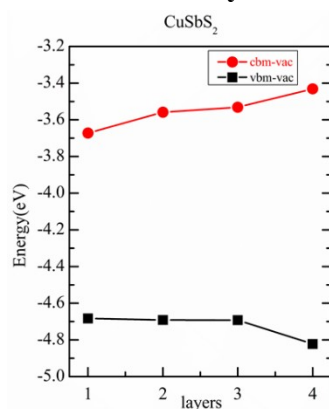

**Figure S4.** The band edge positions changes with same lattice constants from the  $\text{CuSbS}_2$  monolayer to four layers by using the vacuum level as a common reference. The 'vbm-vac' means the VBM minus the vacuum level, and the 'cbm-vac' means the CBM minus the vacuum level.

## 5. Structures, electronic structures, and atomic orbital projected band structures in $\text{CuMCh}_2$ ( $\text{M}=\text{Sb, Bi}$ ; $\text{Ch}=\text{S, Se}$ )

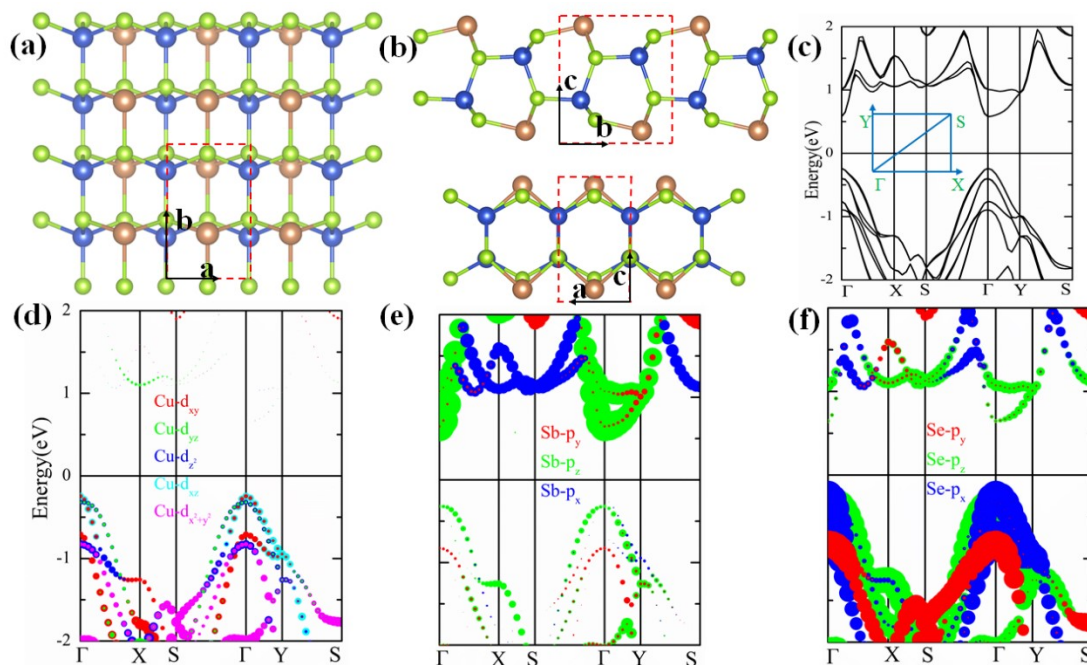

**Figure S5.** The structure, band structure, and atomic orbitals of the monolayer  $\text{CuSbSe}_2$ . (a) and (b) are the top and side views respectively. (c) HSE energy band structure calculations (see the blue inset for the high symmetrical K-points) with the spin-orbit coupling and Van der Waals interactions, where the Fermi level has been set to 0 eV. (d), (e) and (f) are atomic orbital projected band structures in Cu, Sb, Se atoms respectively. The Cu, Sb, Se atoms are shown as blue, brown and green spheres, respectively.

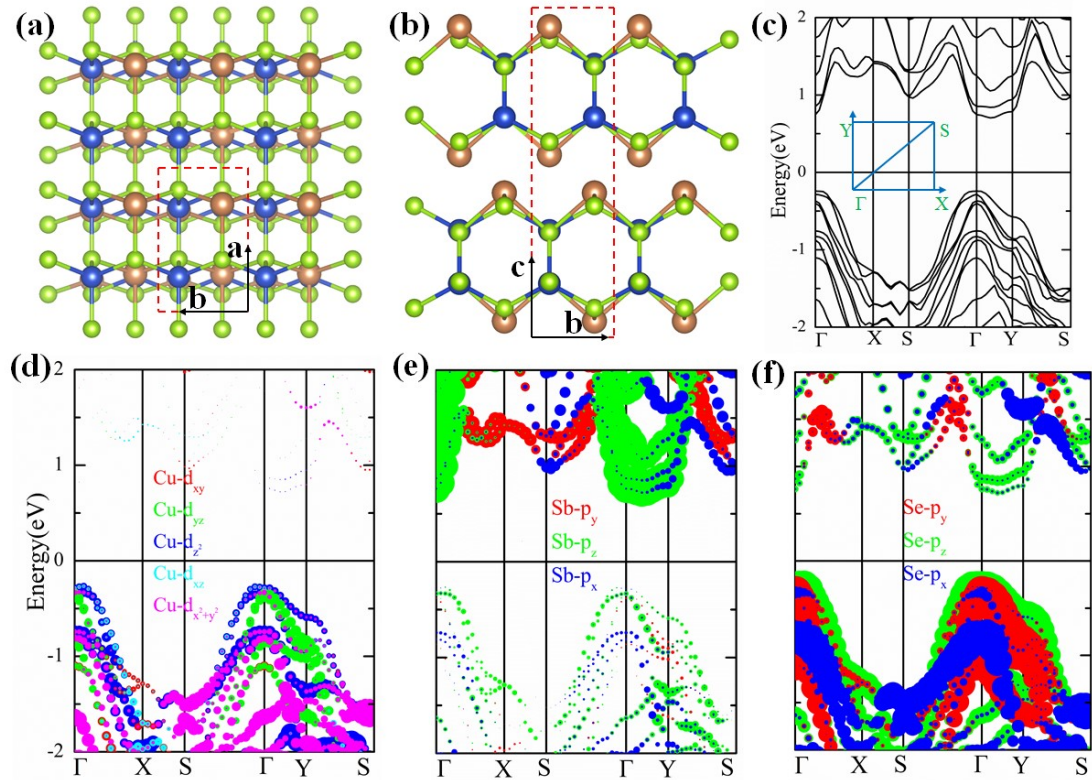

**Figure S6.** The structure, band structure, and atomic orbitals of the bilayer CuSbSe<sub>2</sub>. (a) and (b) are the top and side views respectively. (c) HSE energy band structure calculations (see the blue inset for the high symmetrical K-points) with the spin-orbit coupling and Van der Waals interactions, where the Fermi level has been set to 0 eV. (d), (e) and (f) are atomic orbital projected band structures in Cu, Sb, Se atoms respectively. The Cu, Sb, Se atoms are shown as blue, brown and green spheres, respectively.

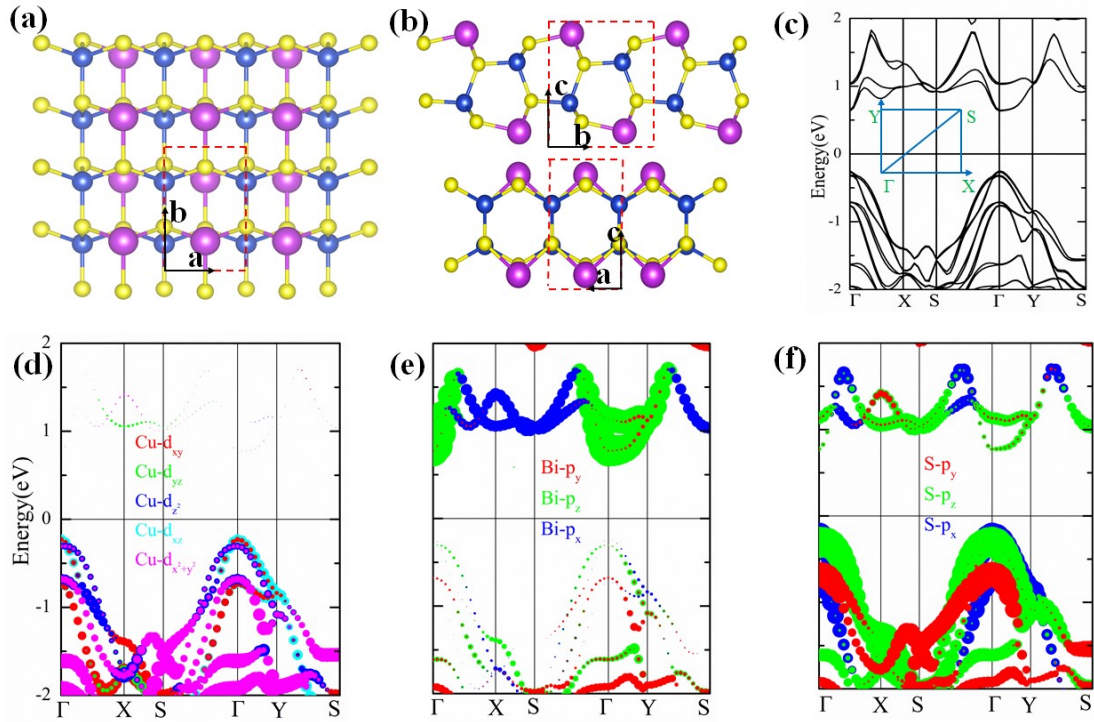

**Figure S7.** The structure, band structure, and atomic orbitals of the monolayer CuBiS<sub>2</sub>. (a) and (b) are the top and side views respectively. (c) HSE energy band structure calculations (see the blue inset for the high symmetrical K-points) with the spin-orbit coupling and Van der Waals interactions, where the Fermi level has been set to 0 eV. (d), (e) and (f) are atomic orbital projected band structures in Cu, Bi, S atoms respectively. The Cu, Bi, S atoms are shown as blue, purple and yellow spheres, respectively.



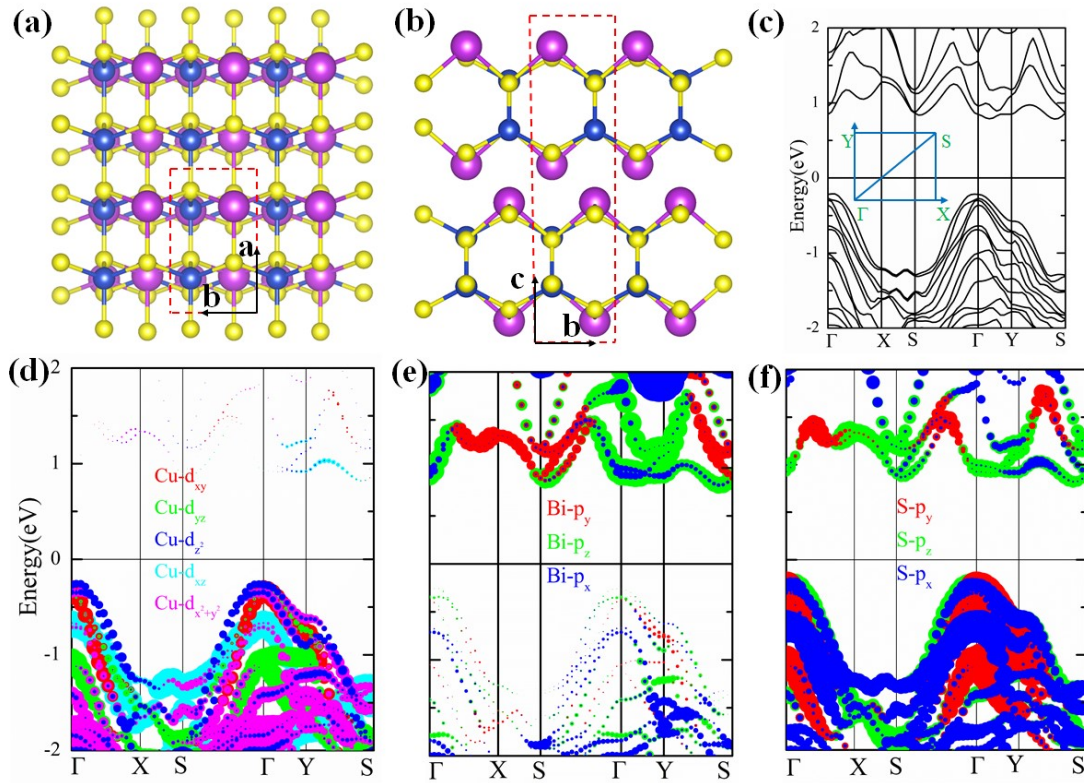

**Figure S8.** The structure, band structure, and atomic orbitals of the bilayer CuBiS<sub>2</sub>. (a) and (b) are the top and side views respectively. (c) HSE energy band structure calculations (see the blue inset for the high symmetrical K-points) with the spin-orbit coupling and Van der Waals interactions, where the Fermi level has been set to 0 eV. (d), (e) and (f) are atomic orbital projected band structures in Cu, Bi, S atoms respectively. The Cu, Bi, S atoms are shown as blue, purple and yellow spheres, respectively.

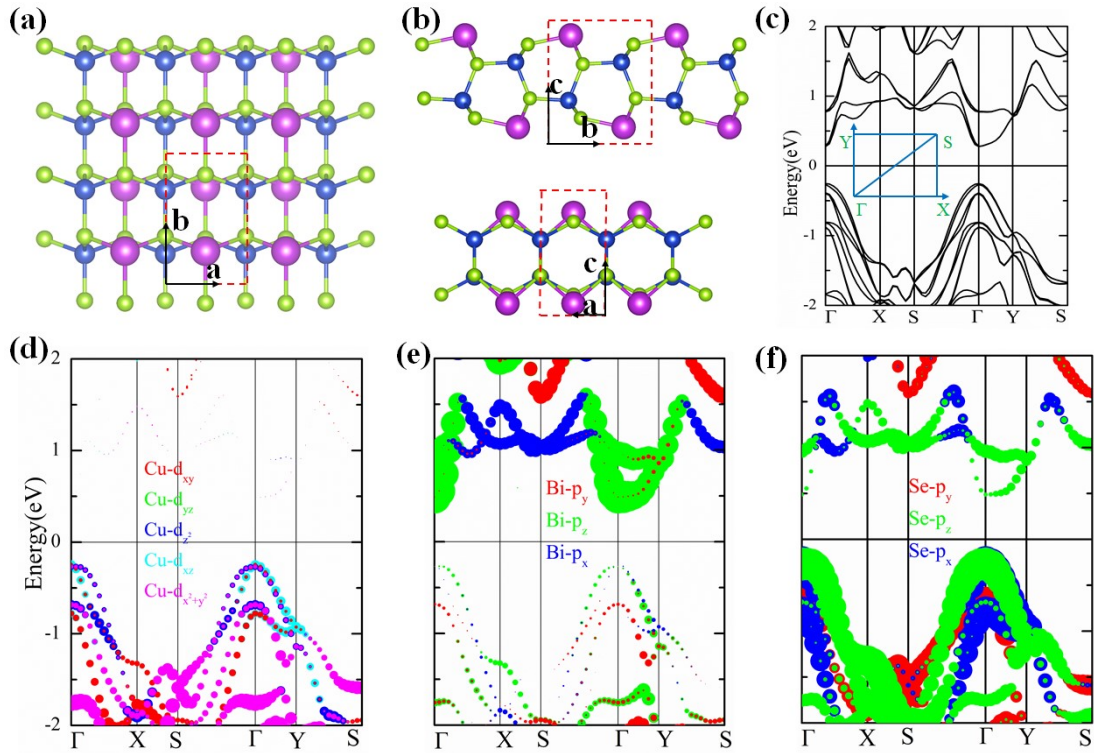

**Figure S9.** The structure, band structure, and atomic orbitals of the monolayer CuBiSe<sub>2</sub>. (a) and (b) are the top and side views respectively. (c) HSE energy band structure calculations (see the blue inset for the high symmetrical K-points) with the spin-orbit coupling and Van der Waals interactions, where the Fermi level has been set to 0 eV. (d), (e) and (f) are atomic orbital projected band structures in Cu, Bi, Se atoms respectively. The Cu, Bi, Se atoms are shown as blue, purple and green spheres, respectively.

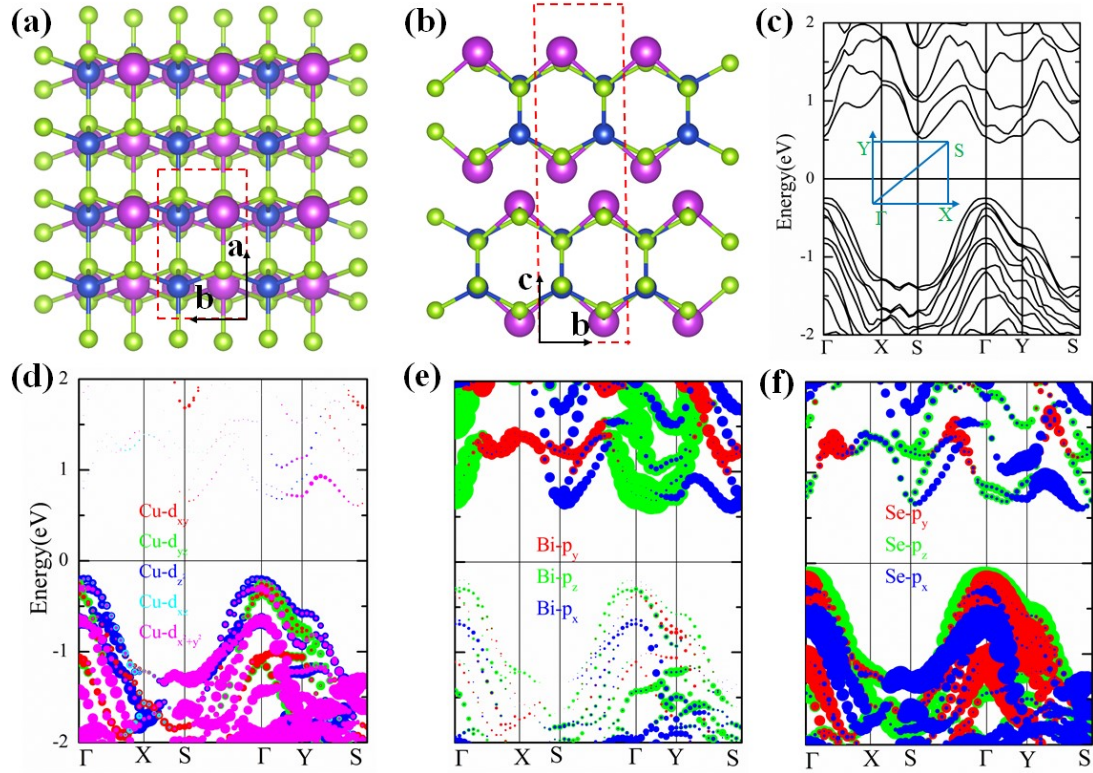

**Figure S10.** The structure, band structure, and atomic orbitals of the bilayer CuBiSe<sub>2</sub>. (a) and (b) are the top and side views respectively. (c) HSE energy band structure calculations (see the blue inset for the high symmetrical K-points) with the spin-orbit coupling and Van der Waals interactions, where the Fermi level has been set to 0 eV. (d), (e) and (f) are atomic orbital projected band structures in Cu, Bi, Se atoms respectively. The Cu, Bi, Se atoms are shown as blue, purple and green spheres, respectively.

## 6. Carrier mobilities.

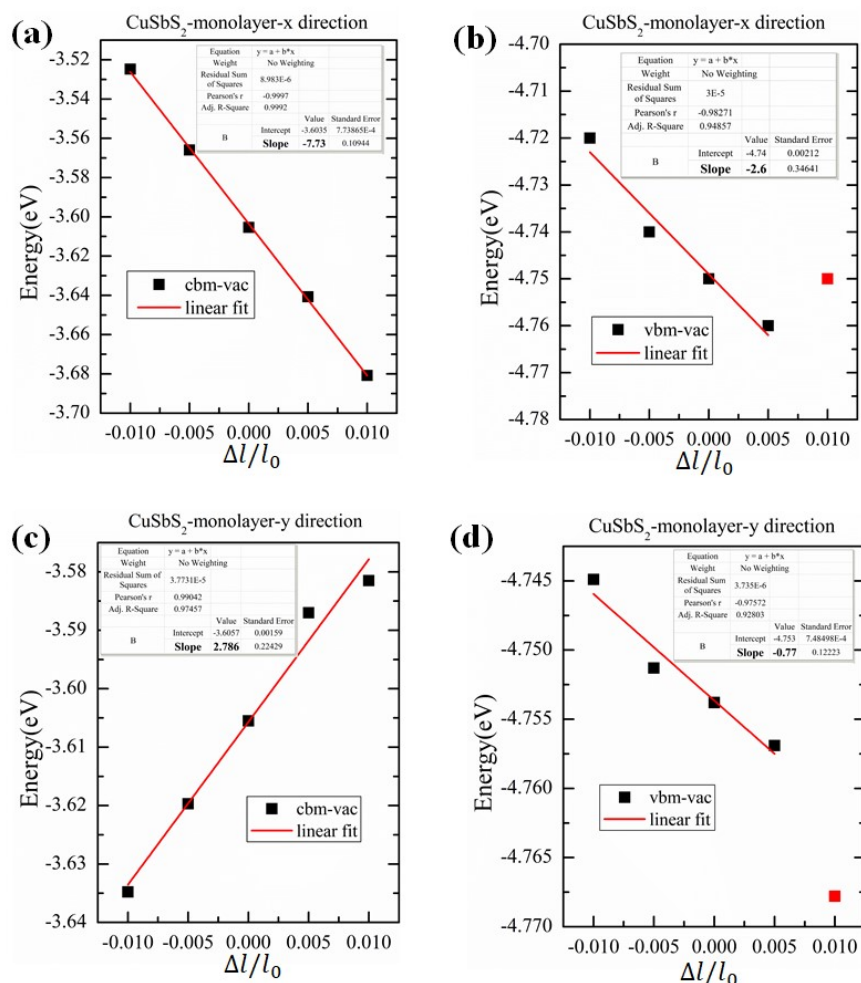

**Figure S11.** The slopes of (a) and (b) are respectively the deformation potential constants of the electron and hole of CuSbS<sub>2</sub> along the x direction, (c) and (d) are the deformation potential constants of the electron and hole of CuSbS<sub>2</sub> along the y direction respectively. The 'vbm-vac' means the VBM minus the vacuum level, and the 'cbm-vac' means the CBM minus the vacuum level. The red dots of (b) and (d) deviate more, so these data are omitted.

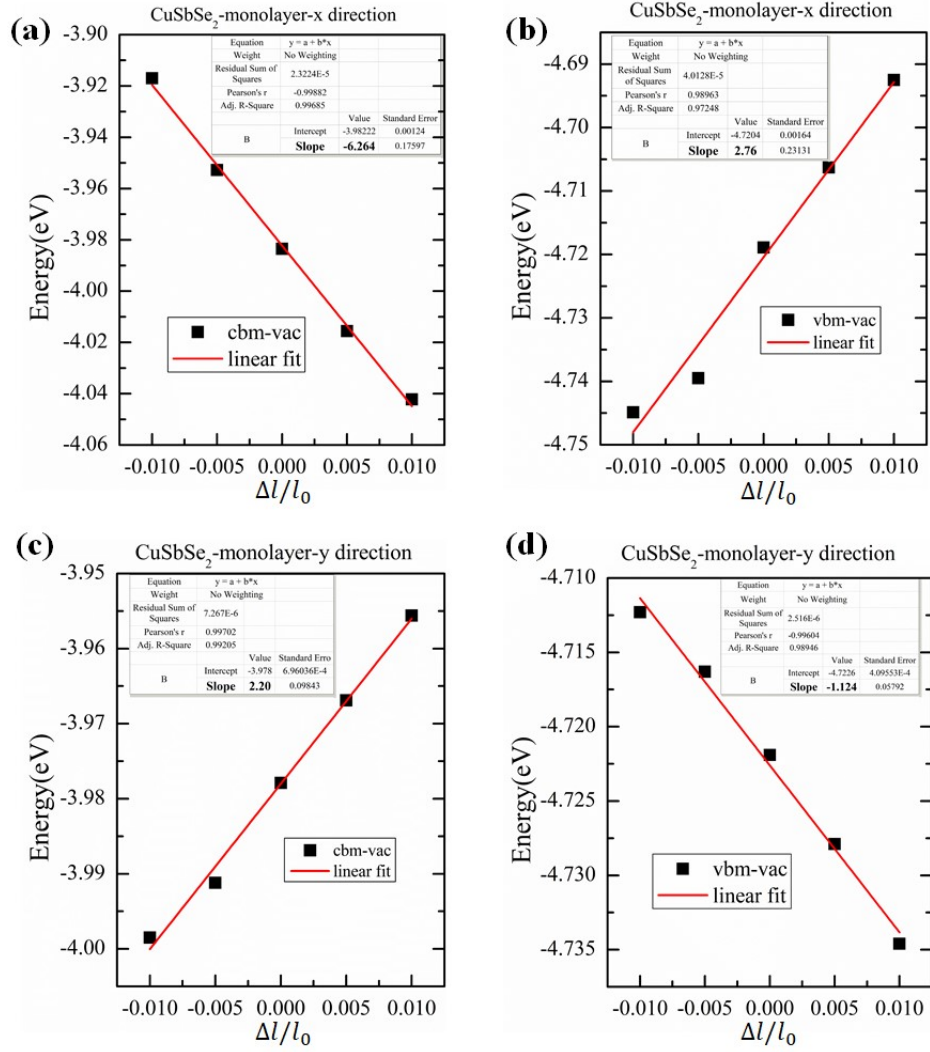

**Figure S12.** The slopes of (a) and (b) are respectively the deformation potential constants of the electron and hole of CuSbSe<sub>2</sub> along the x direction, (c) and (d) are the deformation potential constants of the electron and hole of CuSbSe<sub>2</sub> along the y direction respectively. The ‘vbm-vac’ means the VBM minus the vacuum level, and the ‘cbm-vac’ means the CBM minus the vacuum level.



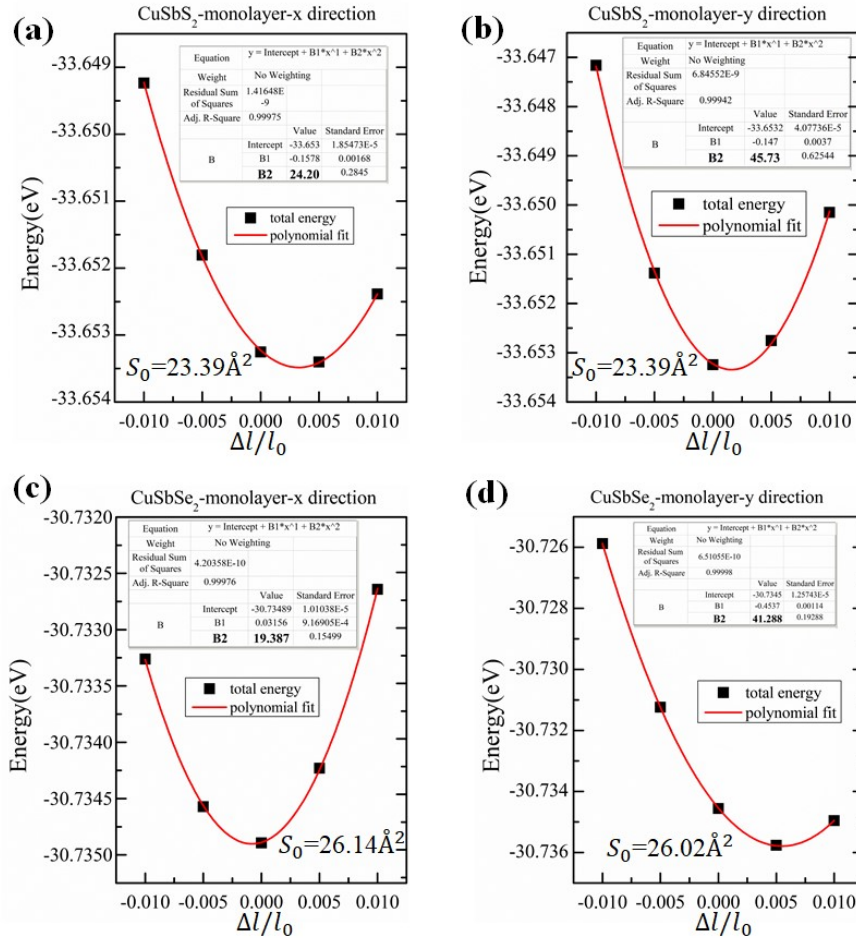

**Figure S13.** (a) and (b) are the fitting of the total energies of CuSbS<sub>2</sub> as functions of in-plane strains along the x direction and the y direction respectively, (c) and (d) are the fitting of the total energies of CuSbSe<sub>2</sub> as functions of in-plane strains along the x direction and the y direction respectively.  $S_0$  denotes the in-plane area under equilibrium.

| materials                      | $m_x^*(m_0)$ | $m_y^*(m_0)$ | $E_{1x}(J \cdot 10^{-19})$ | $E_{1y}(J \cdot 10^{-19})$ | $C_{2D-x}(J/m^2)$ | $C_{2D-y}(J/m^2)$ | $\mu_{2D-x}(cm^2/(V \cdot s))$ | $\mu_{2D-y}(cm^2/(V \cdot s))$ |
|--------------------------------|--------------|--------------|----------------------------|----------------------------|-------------------|-------------------|--------------------------------|--------------------------------|
| CuSbS <sub>2</sub> (electron)  | 0.25         | 2.49         | 12.37                      | 4.46                       | 33.12             | 62.56             | 59.94                          | 87.44                          |
| CuSbS <sub>2</sub> (hole)      | 0.67         | 0.85         | 4.16                       | 1.23                       | 33.12             | 62.56             | 208.3                          | 3547.56                        |
| CuSbSe <sub>2</sub> (electron) | 0.27         | 2.25         | 10.02                      | 3.52                       | 23.74             | 50.78             | 61.41                          | 127.72                         |
| CuSbSe <sub>2</sub> (hole)     | 0.52         | 0.72         | 4.42                       | 1.8                        | 23.74             | 50.78             | 209.52                         | 1951.68                        |

**Table S1.** The carrier mobility of monolayer CuSbCh<sub>2</sub>(Ch=S, Se) with direct bandgaps

using the deformation potential with formula  $\mu_{2D} = \frac{e\hbar^3 C_{2D}}{k_B T m^* m_d E_1^2}$  [1-4], where  $\frac{e\hbar^3}{k_B T} \sim 4.539 \times 10^{-101} C \cdot J^2 \cdot s^3$ ;  $m_d$ , defining  $m_d = \sqrt{m_x^* m_y^*}$ , is the average effective mass of

$$E_1 = \frac{\Delta E}{\Delta(\frac{\Delta l}{l_0})}$$

the carrier;  $k_B$  is Boltzmann's constant;  $E_1$ , which is defined as  $\Delta(\frac{\Delta l}{l_0})$ , denotes the deformation potential constant of hole or electron along the direction of transmission;

$$C_{2D} = \frac{2}{S_0} \times \frac{\partial^2 E}{\partial(\frac{\Delta l}{l_0})^2}$$

the crystal's the elastic modulus  $C_{2D}$ .  $m^*$  denotes the effective mass along the direction of transmission.  $\Delta E$  is the energy change of CBM or VBM under in-plane compression or tensile strain;  $l_0$  is the equilibrium lattice constant in the direction of transmission, and  $\Delta l$  is the deformation of  $l_0$ .  $S_0$  denotes in-plane area under equilibrium.  $m_0$  denotes electron mass with value of  $9.11 \times 10^{-31}$  kg.  $\mu_{2D}$  denotes carrier mobility. Temperature T is set to 300 K. The unit  $1V = 1J/C$ .

**7. Bandgaps calculated by PBE/HSE with/without SOC between monolayer and bilayer CuMCh<sub>2</sub>(M=Sb, Bi; Ch=S, Se).**

| function              | PBE+VdW |                    |                         |                     |                          |                    |                         |                     |                          |
|-----------------------|---------|--------------------|-------------------------|---------------------|--------------------------|--------------------|-------------------------|---------------------|--------------------------|
|                       | layers  | CuSbS <sub>2</sub> | CuSbS <sub>2</sub> +SOC | CuSbSe <sub>2</sub> | CuSbSe <sub>2</sub> +SOC | CuBiS <sub>2</sub> | CuBiS <sub>2</sub> +SOC | CuBiSe <sub>2</sub> | CuBiSe <sub>2</sub> +SOC |
| monolayer-bandgap(eV) |         | 0.41               | 0.40                    | 0.21                | 0.19                     | 0.34               | 0.26                    | 0.19                | 0.14                     |
| bilayer-bandgap(eV)   |         | 0.6                | 0.58                    | 0.3                 | 0.27                     | 0.47               | 0.39                    | 0.27                | 0.21                     |

**Table S2.** The bandgaps obtained using PBE functionals with/without the SOC effects and all data consider Van der Waals interactions.



| function              | HSE+VdW            |                         |                     |                          |                    |                         |                     |                          |
|-----------------------|--------------------|-------------------------|---------------------|--------------------------|--------------------|-------------------------|---------------------|--------------------------|
| layers                | CuSbS <sub>2</sub> | CuSbS <sub>2</sub> +SOC | CuSbSe <sub>2</sub> | CuSbSe <sub>2</sub> +SOC | CuBiS <sub>2</sub> | CuBiS <sub>2</sub> +SOC | CuBiSe <sub>2</sub> | CuBiSe <sub>2</sub> +SOC |
| monolayer-bandgap(eV) | 1.18               | 1.16                    | 0.89                | 0.81                     | 1.00               | 0.88                    | 0.73                | 0.53                     |
| bilayer-bandgap(eV)   | 1.37               | 1.35                    | 0.99                | 0.95                     | 1.08               | 1.00                    | 0.81                | 0.71                     |

**Table S3.** The bandgaps obtained using HSE functionals with/without the SOC effects and all data consider Van der Waals interactions.

**8. The bandgaps changes from CuSbS<sub>2</sub>/CuBiS<sub>2</sub> monolayer to CuSbS<sub>2</sub>-CuBiS<sub>2</sub> Van der Waals heterojunction.**

|                               | Monolayer-CuSbS <sub>2</sub> | Monolayer-CuBiS <sub>2</sub> | Hetero-CuSbS <sub>2</sub> | Hetero-CuBiS <sub>2</sub> |
|-------------------------------|------------------------------|------------------------------|---------------------------|---------------------------|
| bandgap(eV) at $\Gamma$ point | 1.13                         | 0.98                         | 1.23                      | 1.33                      |

**Table S4.** The bandgaps in CuSbS<sub>2</sub>/CuBiS<sub>2</sub> monolayer and CuSbS<sub>2</sub>-CuBiS<sub>2</sub> Van der Waals heterojunction.

## 9. Hopping integrals

**Table S5.** Orbital hopping integrals in the bilayer  $\text{CuSbSe}_2$ , where  $\text{Se}^{(4)}\text{-p}_z$  indicates the  $p_z$  orbital of the fourth selenium atom (other atomic orbitals symbol deduced by analogy). The unit is eV.

| CuSbSe <sub>2</sub> hopping integrals         |                                   |
|-----------------------------------------------|-----------------------------------|
| Orbitals                                      | Sb <sup>(4)</sup> -p <sub>z</sub> |
| Se <sup>(4)</sup> -p <sub>z</sub>             | 0.70                              |
| Se <sup>(4)</sup> -p <sub>y</sub>             | -0.87                             |
| Cu <sup>(2)</sup> -d <sub>z<sup>2</sup></sub> | -0.39                             |
| Sb <sup>(3)</sup> -p <sub>z</sub>             | 0.14                              |

**Table S6.** Orbital hopping integrals in the bilayer  $\text{CuBiS}_2$ , where  $\text{S}^{(1)}\text{-p}_z$  indicates the  $\text{p}_z$  orbital of the first sulfur atom (other atomic orbitals symbol deduced by analogy). The unit is eV.

| CuBiS <sub>2</sub> hopping integrals          |                                   |
|-----------------------------------------------|-----------------------------------|
| Orbitals                                      | Bi <sup>(2)</sup> -p <sub>z</sub> |
| S <sup>(1)</sup> -p <sub>z</sub>              | 0.71                              |
| S <sup>(1)</sup> -p <sub>y</sub>              | -0.89                             |
| Cu <sup>(4)</sup> -d <sub>z<sup>2</sup></sub> | -0.43                             |
| Bi <sup>(1)</sup> -p <sub>z</sub>             | 0.15                              |

**Table S7.** Orbital hopping integrals in the bilayer CuBiSe<sub>2</sub>, where Se<sup>(1)</sup>-p<sub>z</sub> indicates the p<sub>z</sub> orbital of the first selenium atom (other atomic orbitals symbol deduced by analogy). The unit is eV.

| CuBiSe <sub>2</sub> hopping integrals         |                                   |
|-----------------------------------------------|-----------------------------------|
| Orbitals                                      | Bi <sup>(2)</sup> -p <sub>z</sub> |
| Se <sup>(1)</sup> -p <sub>z</sub>             | 0.69                              |
| Se <sup>(1)</sup> -p <sub>y</sub>             | -0.88                             |
| Cu <sup>(4)</sup> -d <sub>z<sup>2</sup></sub> | -0.43                             |
| Bi <sup>(1)</sup> -p <sub>z</sub>             | 0.11                              |

## REFERENCES

- (1) J. Bardeen, W. Shockley. Physical Review, 1950, 80, 72-80.
- (2) J. Qiao, X. Kong, Z. X. Hu, F. Yang, W. Ji, Nat. Commun. 2014, 5, 4475.
- (3) S. Bruzzone, G. Fiori, Appl. Phys. Lett. 2011, 99, 222108.
- (4) R. Fei, A. Faghaninia, R. Soklaski, J. A. Yan, C. Lo, L. Yang, Nano Lett. 2014, 14, 6393 –6399.
